# Supplementary material for: RecurIndex-Guided postoperative radiotherapy with or without Avoidance of Irradiation of regional Nodes in 1–3 node-positive breast cancer (RIGAIN): a study protocol for a multicentre, open-label, randomised controlled prospective, phase III trial
Source: HighWire-hosted journal article supplement (doi:10.1136/bmjopen-2023-078049), 2024-07-01
Supplement: bmjopen-2023-078049supp006_data_supplement.pdf [file bmjopen-2023-078049supp006_data_supplement.pdf]

Supplementary 6. Harris Cosmetic Grade Rating of Cosmetic Breast Preservation/Reconstructive Surgery Results

| Level           | Double breast symmetry | Double nipple level gap | Breast shape on the affected side                                                                                                                                                           | Skin                      |
|-----------------|------------------------|-------------------------|---------------------------------------------------------------------------------------------------------------------------------------------------------------------------------------------|---------------------------|
| Excellent, Good | Symmetries             | ≤2cm                    | No significant difference with the healthy side, normal appearance, no deformation of the breast lift due to scarring, no difference between the affected side and the healthy side in feel | Normal                    |
| General         | Symmetries             | 2cm-3cm                 | The shape of the affected breast is basically normal or slightly smaller than the healthy side, and the feel of the affected side is slightly worse.                                        | Lightened or shiny color  |
| Bad             | Obvious asymmetry      | >3cm                    | The appearance of the affected side of the breast changes and is significantly smaller than the healthy side, and feels poorly in the hand                                                  | Thick, rubber-like, rough |
