# Supplementary material for: RecurIndex-Guided postoperative radiotherapy with or without Avoidance of Irradiation of regional Nodes in 1–3 node-positive breast cancer (RIGAIN): a study protocol for a multicentre, open-label, randomised controlled prospective, phase III trial
Source: HighWire-hosted journal article supplement (doi:10.1136/bmjopen-2023-078049), 2024-07-01
Supplement: bmjopen-2023-078049supp007_data_supplement.pdf [file bmjopen-2023-078049supp007_data_supplement.pdf]

Supplementary 7. Baker's classification of the prosthetic envelope

| Grading                    | Breast Implants                                                                               |
|----------------------------|-----------------------------------------------------------------------------------------------|
| I (no accessible envelope) | Breast implants feel as soft as non-operated breasts                                          |
| II(Lightly hardened)       | The softness of the breast is slightly worse, the implant can be touched but not seen         |
| III(Heavy hardening)       | Harder breasts, implants can be easily touched out or visible deformation of the implant      |
| IV(severe contracture)     | Breasts are hard, painful when touched, skin temperature becomes cold, deformation is obvious |

Only Baker grade III and IV are defined as periosteal contracture and require reoperation
