# Supplementary material for: RecurIndex-Guided postoperative radiotherapy with or without Avoidance of Irradiation of regional Nodes in 1–3 node-positive breast cancer (RIGAIN): a study protocol for a multicentre, open-label, randomised controlled prospective, phase III trial
Source: HighWire-hosted journal article supplement (doi:10.1136/bmjopen-2023-078049), 2024-07-01
Supplement: bmjopen-2023-078049supp011_data_supplement.pdf [file bmjopen-2023-078049supp011_data_supplement.pdf]

Supplementary 11 Dose distribution and organ endangerment limits

| Target Volume                                                     | Dmax  | Dmin |
|-------------------------------------------------------------------|-------|------|
| Whole Breast PTV_2                                                | ≤107% | ≥90% |
| Tumor Bed PTV_1                                                   | ≤107% | ≥90% |
| Whole Breast and Low-to-Mid Axilla Integrated Target Volume PTV_2 | ≤107% | ≥90% |
| Chest Wall PTV_CW                                                 | ≤110% | ≥90% |
| Supraclavicular (±intranodal clavicular) PTV_LN                   | ≤110% | ≥90% |
| Internal Mammary PTV_IMN                                          | ≤110% | ≥80% |
